**Supplemental Material for “Heterogeneity of Diagnosis and Documentation of Post COVID Conditions in Primary Care: A Machine Learning Analysis”**

*I. Symptoms included in identification of candidate cohort. Object identifiers are from the National Library of Medicine Value Set Authority Center.*

| <b>Symptom</b>      | <b>Object Identifier(s)</b>                                                                |
|---------------------|--------------------------------------------------------------------------------------------|
| Shortness of breath | 2.16.840.1.113762.1.4.1182.47                                                              |
| Fatigue             | 2.16.840.1.113762.1.4.1146.862 and<br>2.16.840.1.113762.1.4.1146.860                       |
| Headache            | 2.16.840.1.113883.17.4077.3.1027                                                           |
| Loss of smell       | 2.16.840.1.113762.1.4.1146.1202 and<br>2.16.840.1.113762.1.4.1146.1201                     |
| Brain fog           | 2.16.840.1.113762.1.4.1222.1377                                                            |
| Poor memory         | 2.16.840.1.113883.3.3616.200.110.102.3221 and<br>2.16.840.1.113883.3.3616.200.110.102.6310 |
| Dizziness           | 2.16.840.1.113883.3.3616.200.110.102.3223 and<br>2.16.840.1.113883.3.3616.200.110.102.6315 |
| Depressed mood      | 2.16.840.1.113883.3.600.145                                                                |
| Anxious mood        | 2.16.840.1.113762.1.4.1021.94                                                              |
| Sleep disruption    | 2.16.840.1.113762.1.4.1222.1318                                                            |

## *II. Details of computing environment*

All computations were run on a server hosted on the premises of Stanford University that is designed to host high-risk data. The server runs Ubuntu Linux 20.04 and compute nodes used for this project were provisioned with 8 CPUs, 1 NVIDIA A100 GPU, and 124 GB memory. Data wrangling was performed in R 4.2 using tidyverse and data.table packages. Other analyses were conducted in Python 3.11.10 with the following dependencies: "altair>=5.5.0", "datasets>=3.3.2", "fastparquet>=2024.11.0", "ipykernel>=6.29.5", "joblib>=1.4.2", "jupyterlab>=4.3.5", "matplotlib>=3.10.1", "numpy>=2.2.3", "optuna>=4.2.1", "pandas>=2.2.3", "peft>=0.14.0", "scikit-learn>=1.6.1", "seaborn>=0.13.2", "sentence-transformers>=3.4.1", "statsmodels>=0.14.4", "torch>=2.6.0", and "xgboost>=2.1.4".

III. Monthly diagnoses of PCC in the time since the PCC ICD-10 code became available October 2021 – October 2023.

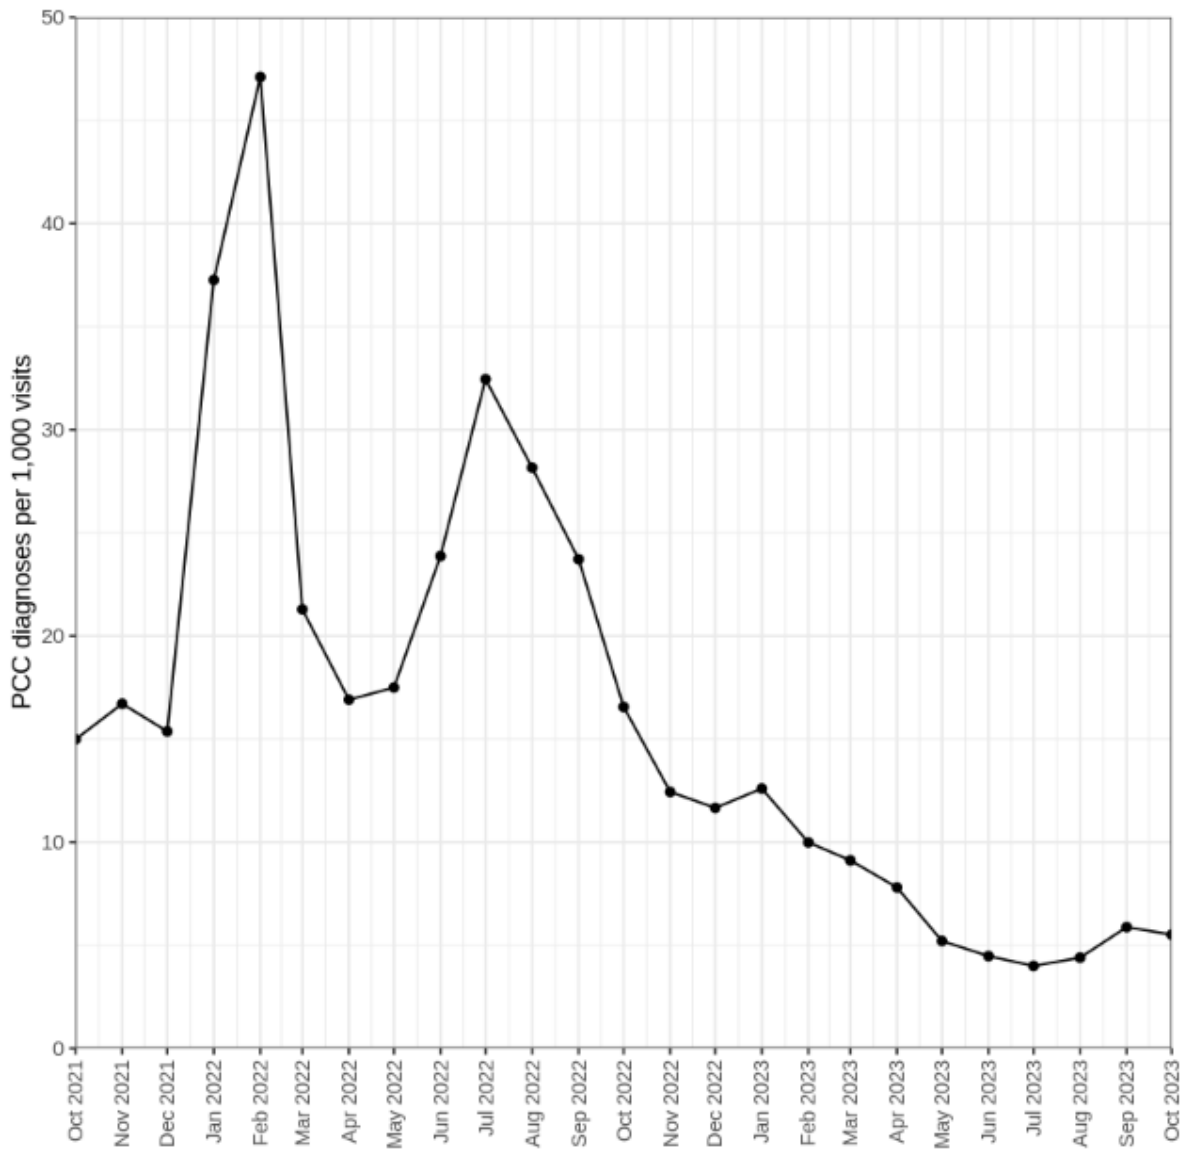

#### IV. *Optimized hyperparameters*

Included hyperparameters were optimized on a 10% validation set for each model using the Optuna package.

##### Models of Diagnostic Code Documentation

###### 1. Full model

Alpha:  $4.9207 * 10^{-4}$

###### 2. Simple model:

Alpha:  $2.7925 * 10^{-4}$

##### Classification Models from Clinical Notes

###### 1. XGBoost (TF-IDF)

Maximum depth: 10

Learning rate: 0.1441

Number of estimators: 448

Minimum child weight: 5

Gamma:  $3.3687 * 10^{-6}$

Subsample: 0.6645

###### 2. RNN

Embedding dimensions: 164

Hidden dimensions: 207

Number of layers: 2

Dropout: 0.4973

Learning rate:  $1.6351 * 10^{-3}$

###### 3. Transformer (finetuned Clinical-Longformer)

Learning rate:  $2.0015 * 10^{-5}$

Weight decay: 0.0131

LoRA rank: 17

LoRA alpha: 30

LoRA dropout: 0.1817

V. *Detailed statistics (with 95% confidence intervals) for predictive models of PCC documentation*

|                                                              | Full model          | Simple model        |
|--------------------------------------------------------------|---------------------|---------------------|
| Optimal threshold (maximum F1 score on positive class)       | 0.550               | 0.550               |
| Matthews correlation coefficient                             | 0.905 (0.904-0.907) | 0.741 (0.739-0.743) |
| F1, positive class                                           | 0.953 (0.953-0.954) | 0.873 (0.872-0.875) |
| F1, negative class                                           | 0.952 (0.951-0.952) | 0.866 (0.865-0.867) |
| Brier score (note: lower score indicates better performance) | 0.038 (0.037-0.038) | 0.095 (0.094-0.096) |

VI. Receiver operating characteristic curve for the three natural language classifiers trained to identify PCC. AUC = area under the curve; CI: credible interval; RNN = recurrent neural network. 95% credible intervals are the result of 1,000 bootstrap samples of the test dataset with model predictions.

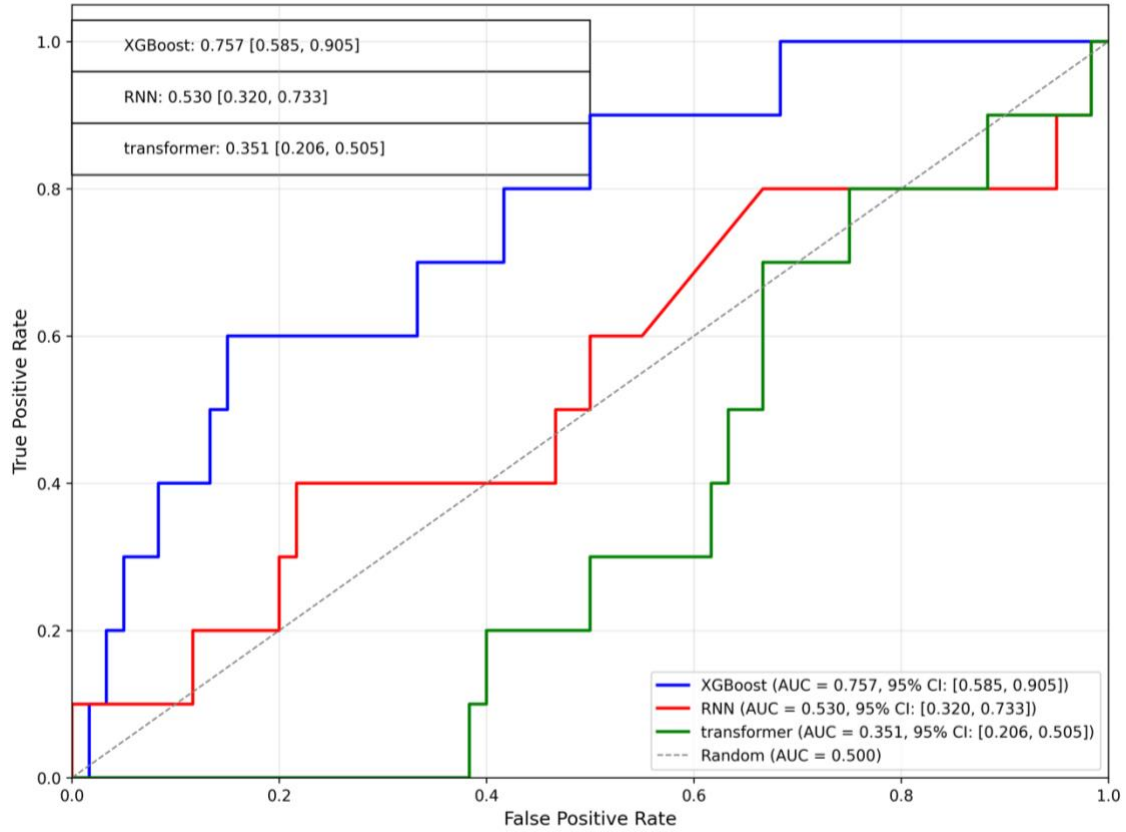

VII. *Confusion matrices for the three NLP models*

**XGBoost**

|      |   |    |   |
|------|---|----|---|
| True | 0 | 51 | 9 |
|      | 1 | 4  | 6 |
|      |   | 0  | 1 |

**Predicted**

**RNN**

|      |   |    |    |
|------|---|----|----|
| True | 0 | 47 | 13 |
|      | 1 | 6  | 4  |
|      |   | 0  | 1  |

**Predicted**

**Transformer**

|      |   |    |    |
|------|---|----|----|
| True | 0 | 15 | 45 |
|      | 1 | 2  | 8  |
|      |   | 0  | 1  |

**Predicted**

VIII. Calibration plot of the three models

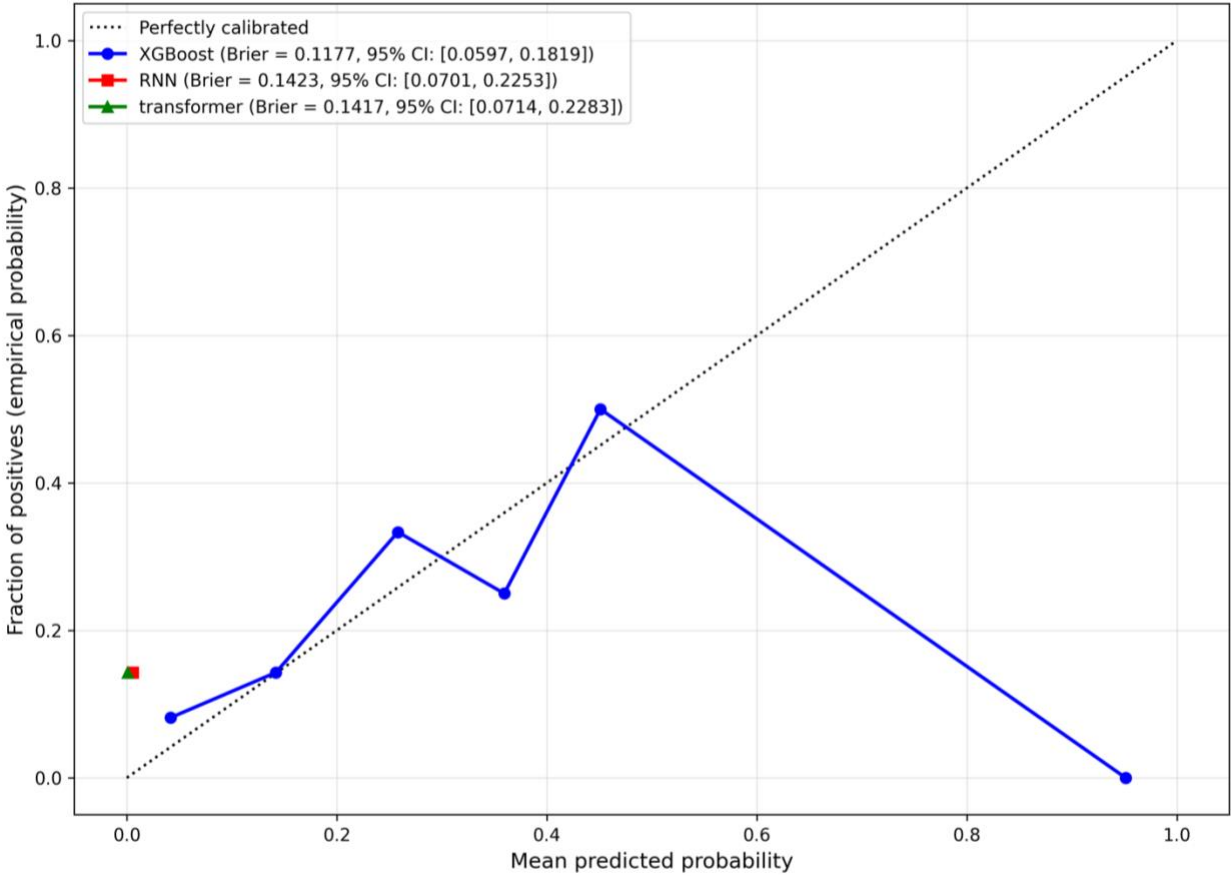

Source: https://storage.googleapis.com/plos-corpus-prod/10.1371/journal.pone.0324017/1/pone.0324017.s001.pdf
